# Supplementary material
Source: PubMed Central journal article supplement (PMC4686849)
Supplement: DC151206SupplementaryData.pdf [file DC151206SupplementaryData.pdf]

## SUPPLEMENTARY DATA

The following individuals and institutions constitute the TODAY Study Group (\* indicates principal investigator or director):

**CLINICAL CENTERS** **Baylor College of Medicine:** S. McKay\*, M. Haymond\*, B. Anderson, C. Bush, S. Gunn, H. Holden, S.M. Jones, G. Jeha, S. McGirk, S. Thamocharan **Case Western Reserve University:** L. Cuttler\*, E. Abrams, T. Casey, W. Dahms (deceased), C. Ievers-Landis, B. Kaminski, M. Koontz, S. MacLeish, P. McGuigan, S. Narasimhan **Children's Hospital Los Angeles:** M. Geffner\*, V. Barraza, N. Chang, B. Conrad, D. Dreimane, S. Estrada, L. Fisher, E. Fleury-Milfort, S. Hernandez, B. Hollen, F. Kaufman, E. Law, V. Mansilla, D. Miller, C. Muñoz, R. Ortiz, A. Ward, K. Wexler, Y.K. Xu, P. Yasuda **Children's Hospital of Philadelphia:** L. Levitt Katz\*, R. Berkowitz, S. Boyd, B. Johnson, J. Kaplan, C. Keating, C. Lassiter, T. Lipman, G. McGinley, H. McKnight, B. Schwartzman, S. Willi **Children's Hospital of Pittsburgh:** S. Arslanian\*, F. Bacha, S. Foster, B. Galvin, T. Hannon, A. Kriska, I. Libman, M. Marcus, K. Porter, T. Songer, E. Venditti **Columbia University Medical Center:** R. Goland\*, D. Gallagher, P. Kringas, N. Leibel, D. Ng, M. Ovalles, D. Seidman **Joslin Diabetes Center:** L. Laffel\*, A. Goebel-Fabbri, M. Hall, L. Higgins, J. Keady, M. Malloy, K. Milaszewski, L. Rasbach **Massachusetts General Hospital:** D.M. Nathan\*, A. Angelescu, L. Bissett, C. Ciccarelli, L. Delahanty, V. Goldman, O. Hardy, M. Larkin, L. Levitsky, R. McEachern, D. Norman, D. Nwosu, S. Park-Bennett, D. Richards, N. Sherry, B. Steiner **Saint Louis University:** S. Tollefsen\*, S. Carnes, D. Dempsher, D. Flomo, T. Whelan, B. Wolff **State University of New York Upstate Medical University:** R. Weinstock\*, D. Bowerman, S. Bristol, J. Bulger, J. Hartsig, R. Izquierdo, J. Kearns, R. Saletsky, P. Trief **University of Colorado Denver:** P. Zeitler\* (Steering Committee Chair), N. Abramson, A. Bradhurst, N. Celona-Jacobs, J. Higgins, M.M. Kelsey, G. Klingensmith, K. Nadeau, T. Witten **University of Oklahoma Health Sciences Center:** K. Copeland\* (Steering Committee Vice-Chair), E. Boss, R. Brown, J. Chadwick, L. Chalmers, S. Chernausek, A. Hebensperger, C. Macha, R. Newgent, A. Nordyke, D. Olson, T. Poulsen, L. Pratt, J. Preske, J. Schanuel, S. Sternlof **University of Texas Health Science Center at San Antonio:** J. Lynch\*, N. Amodei, R. Barajas, C. Cody, D. Hale, J. Hernandez, C. Ibarra, E. Morales, S. Rivera, G. Rupert, A. Wauters **Washington University in St Louis:** N. White\*, A. Arbeláez, D. Flomo, J. Jones, T. Jones, M. Sadler, M. Tanner, A. Timpson, R. Welch **Yale University:** S. Caprio\*, M. Grey, C. Guandalini, S. Lavietes, P. Rose, A. Syme, W. Tamborlane

**COORDINATING CENTER** **George Washington University Biostatistics Center:** K. Hirst\*, S. Edelstein, P. Feit, N. Grover, C. Long, L. Pyle

**PROJECT OFFICE** **National Institute of Diabetes and Digestive and Kidney Diseases:** B. Linder\*

**CENTRAL UNITS** **Central Blood Laboratory (Northwest Lipid Research Laboratories, University of Washington):** S.M. Marcovina\*, J. Harting **DEXA Reading Center (University of California at San Francisco):** J. Shepherd\*, B. Fan, L. Marquez, M. Sherman, J. Wang **Diet Assessment Center (University of South Carolina):** M. Nichols\*, E. Mayer-Davis, Y. Liu **Echocardiogram Reading Center (Johns Hopkins University):** J. Lima\*, S. Gidding, J. Puccella, E. Ricketts **Fundus Photography Reading Center (University of Wisconsin):** R. Danis\*, A. Domalpally, A. Goulding, S. Neill, P. Vargo **Lifestyle Program Core (Washington University):** D. Wilfley\*, D. Aldrich-Rasche, K. Franklin, C. Massmann, D. O'Brien, J. Patterson, T. Tibbs, D. Van Buren

SUPPLEMENTARY DATA

**OTHER** Hospital for Sick Children, Toronto: M. Palmert Medstar Research Institute, Washington DC: R. Ratner Texas Tech University Health Sciences Center: D. Dremaine University of Florida: J. Silverstein

SUPPLEMENTARY DATA

**Supplementary Table 1. Maternal pregnancy care and outcomes (N=60 with data provided)**

| <b>Pregnancy outcome</b>               | <b>All pregnancies (N=60)</b> | <b>Those with prenatal care (N=39)</b> | <b>Those without prenatal care (N=9)</b> | <b>Those with prenatal care not reported (N=12)</b> |
|----------------------------------------|-------------------------------|----------------------------------------|------------------------------------------|-----------------------------------------------------|
| Voluntary/elective termination         | 7 (11.7%)                     | 0 (0%)                                 | 4 (44.4%)                                | 3 (25.0%)                                           |
| Early pregnancy loss/still birth       | 14 (23.3%)                    | 4 (10.3%)                              | 4 (44.4%)                                | 6 (50.0%)                                           |
| Early pre-term live birth (<34 weeks)  | 1 (1.7%)                      | 0 (0%)                                 | 0 (0%)                                   | 1 (8.3%)                                            |
| Late pre-term live birth (34-36 weeks) | 5 (8.3%)                      | 5 (12.8%)                              | 0 (0%)                                   | 0 (0%)                                              |
| Term live birth ( $\geq$ 37 weeks)     | 33 (55.0%)                    | 30 (76.9%)                             | 1 (11.1%)                                | 2 (16.7%)                                           |

SUPPLEMENTARY DATA

**Supplementary Table 2. Maternal complications of pregnancy for N=53 pregnancies**

| <b>Characteristic</b>                              | <b>Frequency (%)</b> |
|----------------------------------------------------|----------------------|
| Maternal hospitalization (other than for delivery) |                      |
| Yes                                                | 13 (24.5%)           |
| No                                                 | 31 (48.5%)           |
| Not reported                                       | 9(17.0%)             |
| Pre-eclampsia                                      |                      |
| Yes                                                | 4 (7.5%)             |
| No                                                 | 40 (75.5%)           |
| Not reported                                       | 9 (17.0%)            |
| Maternal hypertension                              |                      |
| Yes                                                | 10 (18.9%)           |
| No                                                 | 33(62.3%)            |
| Not reported                                       | 10 (18.9%)           |
| Albuminuria/proteinuria $\geq$ 300 mg/g            |                      |
| Yes                                                | 5 (9.4%)             |
| No                                                 | 39 (73.6%)           |
| Not reported                                       | 9 (17.0%)            |
| Albuminuria 30-299 mg/g                            |                      |
| Yes                                                | 3 (5.7%)             |
| No                                                 | 41 (77.4%)           |
| Not reported                                       | 9 (17.0%)            |
| Other reported complications -                     |                      |
| Yes*                                               | 1 (1.9%)             |
| No                                                 | 43 (81.1%)           |
| No data reported                                   | 9 (17.0%)            |
| Results of eye exam prior to pregnancy (N=6)       |                      |
| No retinopathy                                     | 5 (83.3%)            |
| Mild NPDR                                          | 1 (16.7%)            |
| Results of first eye exam after pregnancy (N=29)   |                      |
| No retinopathy                                     | 21 (72.4%)           |
| Mild NPDR                                          | 8 (27.6%)            |

\*Anemia.

SUPPLEMENTARY DATA

**Supplementary Table 3. Newborn complications, live births only (N=36; data not available for 3 infants)**

| <b>Characteristic</b>             | <b>Frequency (%)</b> |
|-----------------------------------|----------------------|
| Newborn prolonged hospitalization |                      |
| Yes                               | 9 (25.0%)            |
| No                                | 27 (75.0%)           |
| Neonatal hypoglycemia             |                      |
| Yes                               | 6 (16.7%)            |
| No                                | 30 (83.3%)           |
| Infant respiratory distress       |                      |
| Yes                               | 3 (8.3%)             |
| No                                | 33 (91.7%)           |
| Neonatal hypocalcemia             |                      |
| Yes                               | 1 (2.8%)             |
| No                                | 35 (97.2%)           |
| Shoulder dystocia                 |                      |
| Yes                               | 0                    |
| No                                | 36 (100.0%)          |
| Caudal regression                 |                      |
| Yes                               | 0                    |
| No                                | 36 (100.0%)          |

SUPPLEMENTARY DATA

**Supplementary Table 4. Congenital Anomalies in the Live Births from the TODAY Study**

| <b>Description of anomaly</b>                                  | <b>Maternal BMI closest to conception*</b> | <b>HbA1c closest to conception (only recorded if within 3 months of conception)*</b> | <b>HbA1c during first trimester (gestational age)*</b> |
|----------------------------------------------------------------|--------------------------------------------|--------------------------------------------------------------------------------------|--------------------------------------------------------|
| Polycystic kidney disease                                      | 29.3 (1 mo after)                          | 5.6% (2 wk after)                                                                    | 5.6% (2 wk)                                            |
| Jejunal atresia requiring bowel resection and ostomy           | 35.3 (9 mo prior)                          | 8.3% (10 wk after)                                                                   | 8.3% (10 wk)                                           |
| Cleft palate                                                   | 20.3 (1 mo prior)                          | 11.9% (2 wk prior)                                                                   | NA                                                     |
| Supracardiac anomalous pulmonary venous return                 | 39.9 (7 mo prior)                          | NA                                                                                   | NA                                                     |
| Small ventricular septal defect with left ventricular dilation | 35.2 (1 mo prior)                          | 5.6% (4 wk prior)                                                                    | NA                                                     |
| Patent foramen ovale                                           | 22.0 (1 yr prior)                          | NA                                                                                   | NA                                                     |
| Ventricular septal defect and, hypertrophic cardiomyopathy     | 43.6 (1 mo prior)                          | 8.9% (5 wk prior)                                                                    | 8% (2 mo)                                              |
| Microcephaly; sacral dimple                                    | 50.2 (2 mo prior)                          | 6.3% (8 wk prior)                                                                    | 6.1% (2 mo)                                            |

\* NA: not available; mo: month(s); wk: week(s); yr: year(s)
